# Supplementary material
Source: Research Square preprint supplement (doi:10.21203/rs.3.rs-9014036/v1)
Supplement: Supplementary file 1 [file 45e1d4f2c554fdfcafe19049.docx]

**TABLES**

**Table 1**

*Comparison of system features and functionalities between version 1.0 and version 2.0.*

| **Iteration Aspects** | ***version* 1.0** | ***version* 2.0** |
| --- | --- | --- |
| Interface | 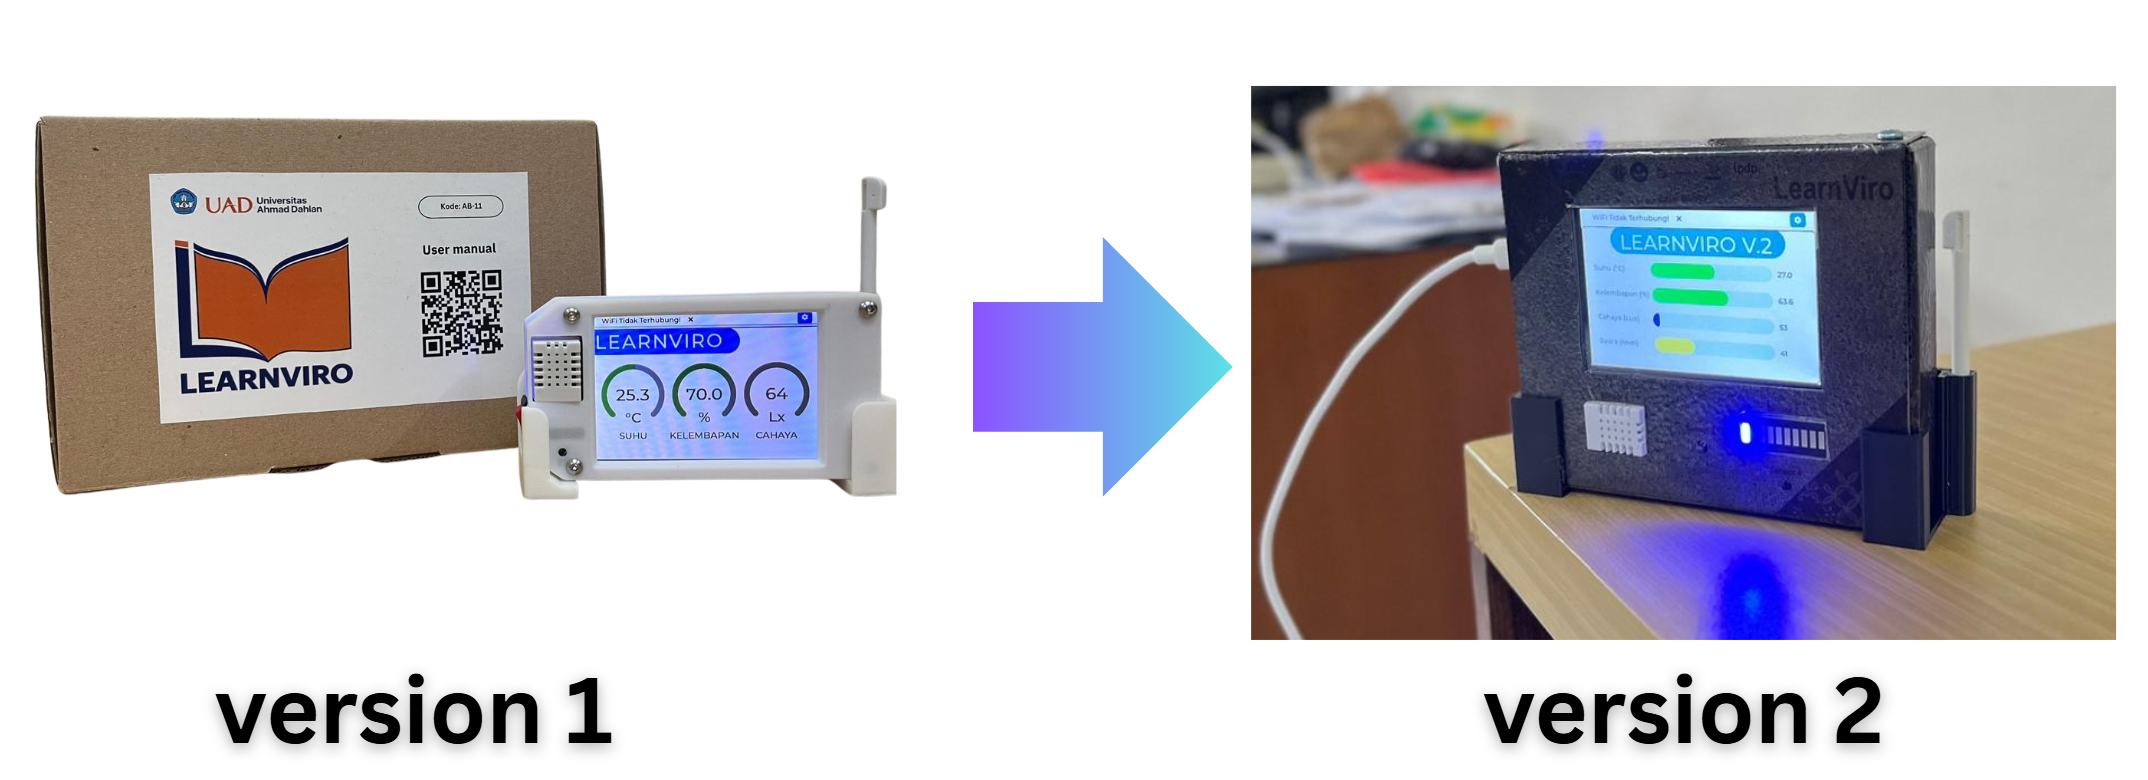 | |
| Sensors | Temperature, humidity, light intensity | Temperature, humidity, light intensity, noise |
| Recommendations | Recommendation to regulate the classroom temperature, light, and humidity through room intervention | Recommendations to regulate the classroom temperature, light, and humidity through room intervention and reducing the noise by managing the students in the classroom. |
| Website features | IoT Dashboard  Learning style instruments  School account  Teachers’ account  Students’ account | IoT Dashboard  Learning style instruments  Students’ progress instruments  School’s account  Teachers’ account |

**Table 2.**

*Environmental parameters and threshold ranges used for classroom condition classification in the IoT-based classroom management system.*

| **Parameters** | **Color Category** | **Threshold Range** | **nterpretation of Conditions** | **Classroom Management Recommendations** |
| --- | --- | --- | --- | --- |
| **Temperature (°C)** | Blue | 10 – < 20 | Too cold | Reduce the AC temperature, close the windows, and keep the students away from direct exposure to the AC |
|  | Green | 20 – 26 | Comfortable | The temperature is good; learning can run optimally |
|  | Red | > 26 – 40 | Too hot | Turn on the AC, open the cross ventilation, and direct the fan outward. |
| **Humidity (%)** | Blue | 20 – < 40 | Too dry | Open the ventilation, add indoor plants, and put a small water container in the classroom |
|  | Green | 40 – 70 | Comfortable | Humidity is good; no need for specific intervention |
|  | Red | > 70 – 90 | Too humid | Open cross ventilation, make sure there is no water source, and use a fan for air circulation |
| **Light Intensity (Lux)** | Blue | 100 – < 300 | Too dark | Open the curtain and move the learning activities to a lighter area. |
|  | Green | 300 – 500 | Comfortable | The lighting is good for learning activities and observation |
|  | Red | > 500 – 700 | Too bright | Close a part of the curtain, use a light diffuser, and change the orientation of the board/display |
| **Noise (dB)** | Blue | 0 – < 40 | Quiet / Calm | The condition is good; maintain the classroom atmosphere |
|  | Green | 40 – 60 | Normal | The classroom noise is in a normal category for learning |
|  | Yellow | > 60 – 80 | Noisy | Rearrange the seating, use non-verbal signs (call-and-response claps, jingles, hand movements), assign structured tasks, and reinforce appropriate behavior. |
|  | Red | > 80 | Too noisy | Immediate interventions: rearrange the classroom, stop activities causing noise, and apply intensive behavioral management. |
